# Supplementary material
Source: Elsevier journal article supplement (https://rcastoragev2.blob.core.windows.net/d8af9e727b4f60727e11defb328aadba/mmc1.pdf)
Supplement: mmc1 [file mmc1.pdf]

**Molecular Cell, Volume 75**

## **Supplemental Information**

### **Structures of Respiratory Supercomplex I+III<sub>2</sub>**

#### **Reveal Functional and Conformational Crosstalk**

**James A. Letts, Karol Fiedorczuk, Gianluca Degliesposti, Mark Skehel, and Leonid A. Sazanov**



## **SUPPLEMENTAL INFORMATION**

### **Structures of Respiratory Supercomplex I+III<sub>2</sub> Reveal Functional and Conformational Crosstalk**

James A. Letts, Karol Fiedorczuk, Gianluca Degliesposti, Mark Skehel and Leonid A. Sazanov

#### **LIST OF SUPPLEMENTAL INFORMATION**

##### **Supplemental Figures**

**Figure S1.** Initial isolation and separation of SC I+III<sub>2</sub>, Related to Figure 1

**Figure S2.** Effect of PO<sub>4</sub> buffer on isolated SC I+III<sub>2</sub> oxidoreductase activity, Related the Figure 2

**Figure S3.** Inhibition of SC I+III<sub>2</sub> activities by known CI and CIII<sub>2</sub> inhibitors, Related to Figure 3

**Figure S4.** Initial cryo-EM processing steps, Related to Figure 4

**Figure S5.** Focused refinements, Related to STAR Methods

**Figure S6.** Focus-Revert-Classify strategy to separate different classes of CI, Related to Figure 5

**Figure S7.** Examples of match between local resolution and model ADPs for isolated CI and SC I+III<sub>2</sub>, Related to Figure 7 and STAR Methods

##### **Supplemental Tables**

**Table S1.** Mass Spectrometry identification for subunits of ovine SC I+III<sub>2</sub>, CI and CIII<sub>2</sub>, Related to Figure 1

**Table S2.** Lipid content of isolated SC I+III<sub>2</sub> particles compared to mitochondrial membranes, Related to STAR methods

**Table S3.** K<sub>cat</sub> for CI and CIII<sub>2</sub> within the SC and Rate Coupling, Related to Figures 2 and 3

**Table S4.** Cryo-EM data collection, Related to Figure 4

**Table S5.** SC I+III<sub>2</sub> closed model overview, Related to STAR Methods



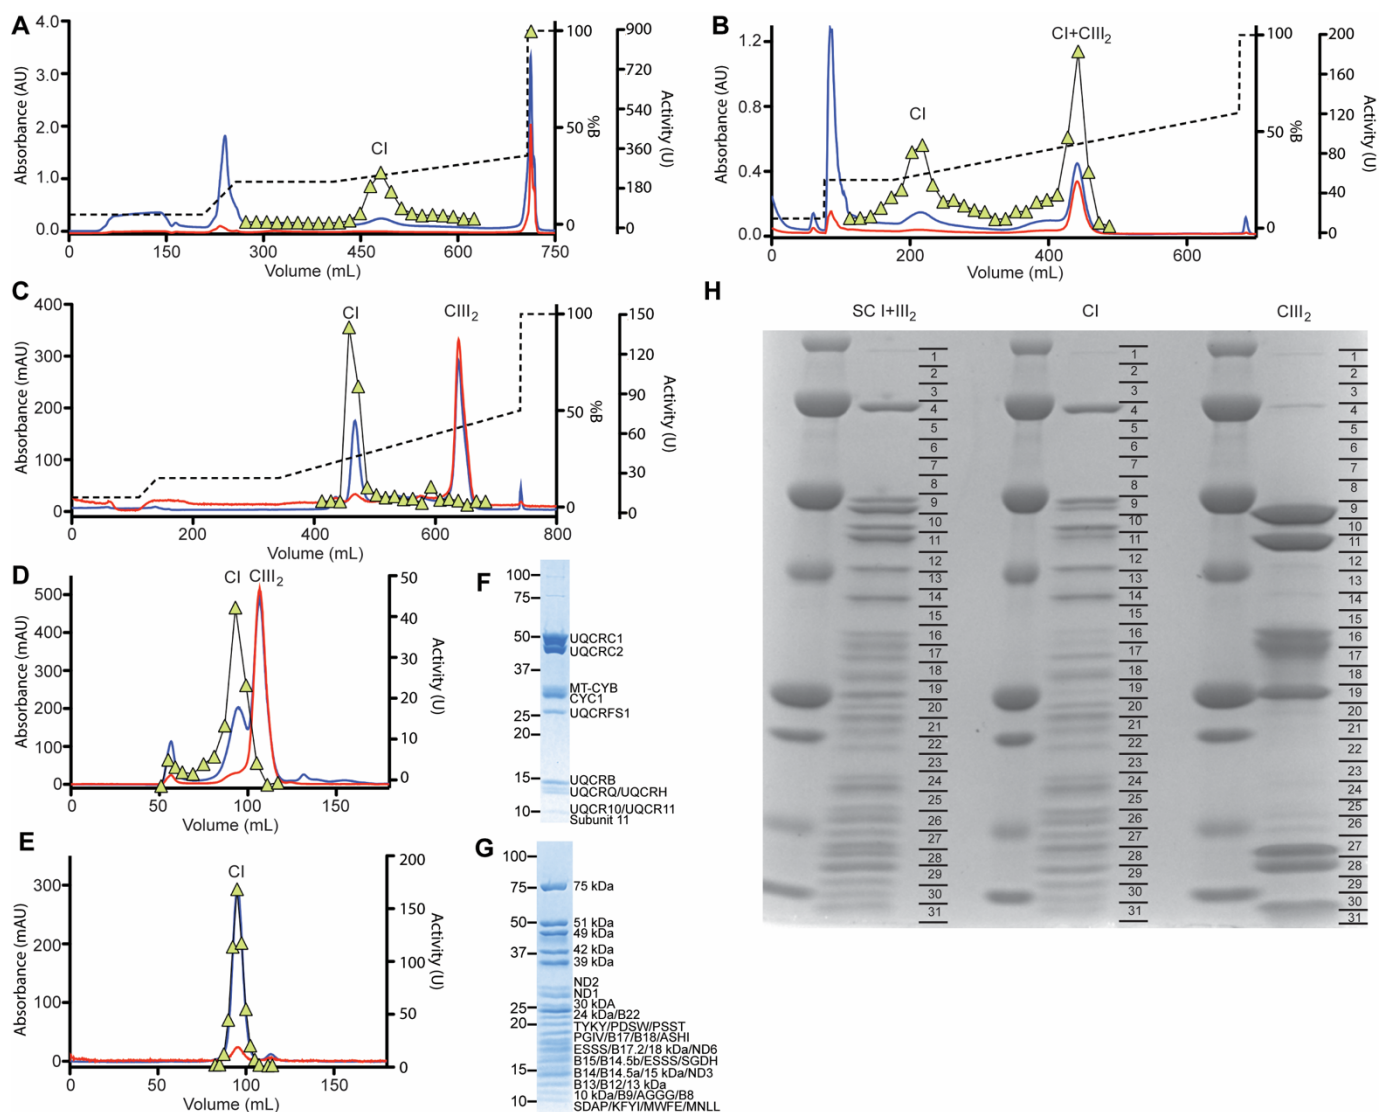

**Figure S1. Initial isolation and separation of SC I+III<sub>2</sub>, Related to Figure 1**

(A) Q-Sepharose anion-exchange column chromatogram of LNMG-extracted washed mitochondrial membranes. In all panels the chromatograms show: A<sub>280</sub>, blue line; A<sub>420</sub>, red line; percent buffer B gradient (containing 1M NaCl), dashed black line; and CI NADH:FeCy activity, lime green triangles. Unlike purifications in DDM, high CI NADH:FeCy activity was seen in the high-salt wash. (B) Altering the gradient profile resulted in a second peak of NADH:FeCy activity associated with high A<sub>420</sub> signal, indicating the presence of heme groups. (C) Re-running the second peak from (B) over anion-exchange resulted in the separation of peaks containing NADH:FeCy activity and most of A<sub>420</sub> signal alone. (D) Running the second peak from (B) over size exclusion chromatography column also resulted in the separation of peaks containing NADH:FeCy activity and most of A<sub>420</sub> signal alone. (E) Running of peak containing NADH:FeCy activity from (C) resulted in highly enriched sample of CI. (F) SDS-PAGE gel of A<sub>420</sub> containing peak from (C) with CIII<sub>2</sub> subunits identified by mass spectrometry (MS). (G) SDS-PAGE gel of NADH:FeCy activity containing peak from (E) with CI subunits identified by MS. (H) SDS-PAGE showing SC I+III<sub>2</sub> sample in amphipol A8-35 (**Figure 1C**), isolated CI (**Figure S1E**) and isolated CIII<sub>2</sub> (**Figure S1C**). Each lane was cut into 31 approximately even bands (indicated on right-hand side of each lane), which were each subjected to MS analysis for protein identification. The results of MS analysis are shown in **Table S1** and the corresponding band for each subunit is indicated. The total amount of protein loaded in the gel was not controlled



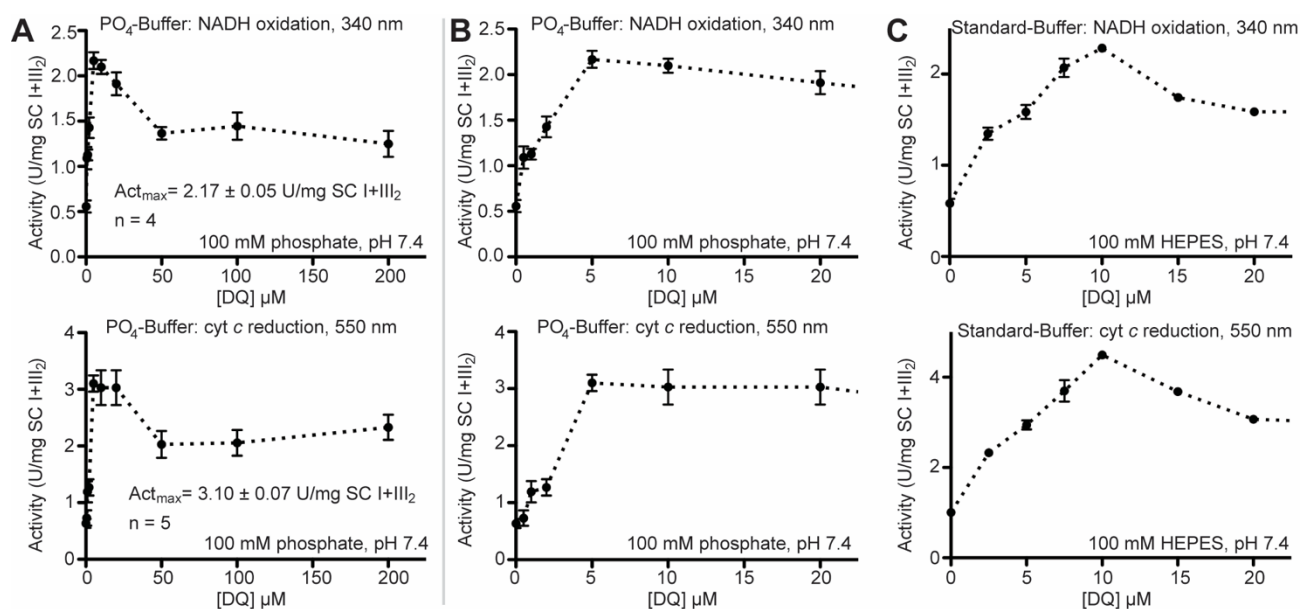

**Figure S2. Effect of PO<sub>4</sub> buffer on isolated SC I+III<sub>2</sub> oxidoreductase activity, Related the Figure 2**

(A) [DQ]-activity curves monitoring NADH oxidation (top) and cyt c reduction (bottom) in 100 mM PO<sub>4</sub> buffer with 100 μM NADH and 100 μM cyt c. (B) Expansion of x-axis (0-20 μM DQ) for [DQ]-activity curves from **Figure S2A**, NADH oxidation (top) and cyt c reduction (bottom). (C) Expansion of x-axis (0-20 μM DQ) for [DQ]-activity curves from **Figure 2D**, NADH oxidation (top) and cyt c reduction (bottom). Activity is reported as Units (1 U = 1 μmol substrate/min per mg of SC I+III<sub>2</sub>). Data plotted as mean ± SEM. Regardless of the broader high-activity range in the phosphate buffer, the overall cyt c reduction activity was lower compared to HEPES. This is likely due to the known strong dependence of the interaction between CIII<sub>2</sub> and cyt c on ionic strength. Therefore, HEPES buffer was used throughout for further activity measurements.



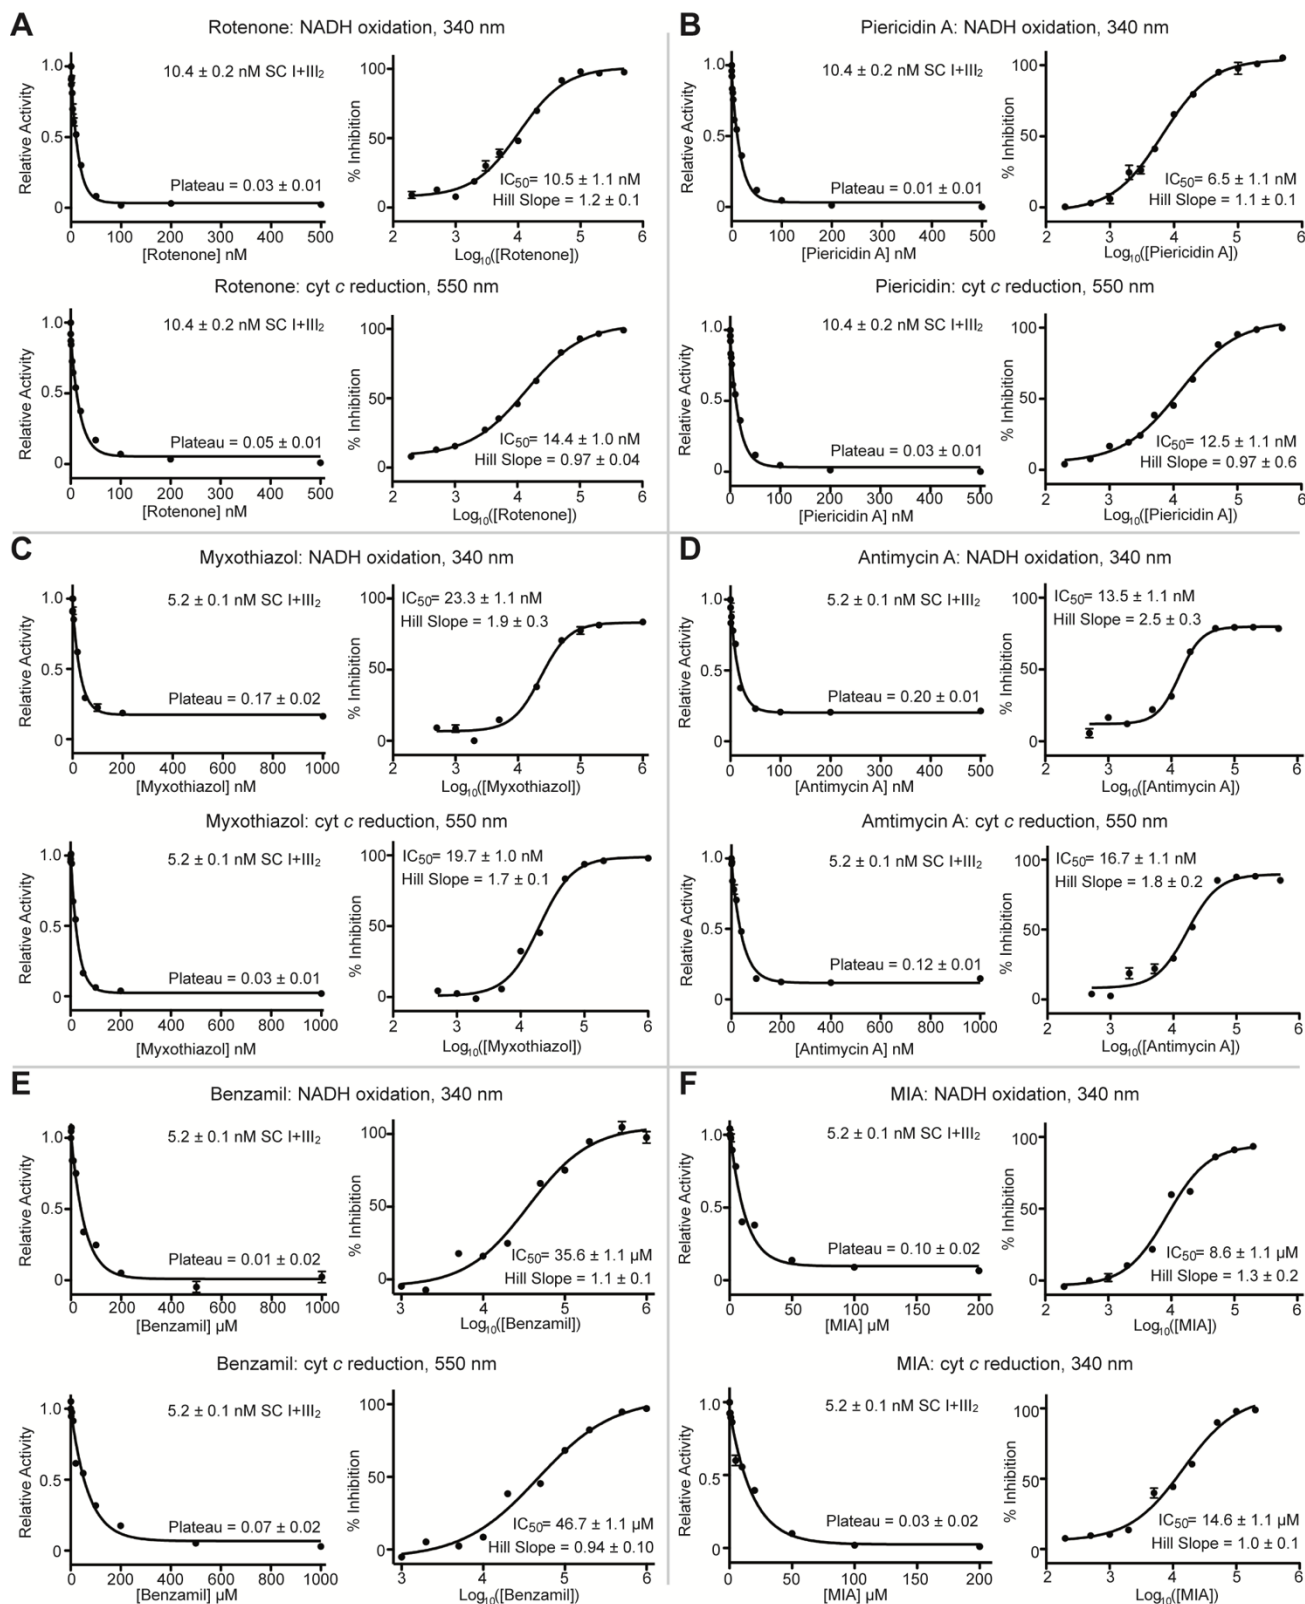



### Figure S3. Inhibition of SC I+III<sub>2</sub> activities by known CI and CIII<sub>2</sub> inhibitors, Related to Figure 3

Relative inhibition vs. concentration (left) and percent inhibition vs.  $\log_{10}([\text{inhibitor}])$  (right) are shown for inhibition of both NADH-oxidation (top) and cyt *c*-reduction (bottom) for each inhibitor. Inhibition was measured with either ~10 nM or ~5 nM SC I+III<sub>2</sub> as indicated for each panel. (A) The CI inhibitor rotenone gave an  $IC_{50}$  of  $10.5 \pm 1.1$  nM for NADH oxidation and  $14.4 \pm 1.0$  nM for cyt *c* reduction, with Hill coefficients of  $1.2 \pm 0.1$  and  $0.97 \pm 0.04$  respectively, consistent with the single known rotenone binding site. (B) The CI inhibitor piericidin A gave an  $IC_{50}$  of  $6.5 \pm 1.1$  nM for NADH oxidation and  $12.5 \pm 1.1$  nM for cyt *c* reduction, with Hill coefficients of  $1.1 \pm 0.1$  and  $0.97 \pm 0.6$  respectively. (C) The CIII<sub>2</sub> Q<sub>P</sub>-site inhibitor myxothiazol inhibited 97 % of the cyt *c*-reduction activity at 1  $\mu$ M with an  $IC_{50}$  of  $19.7 \pm 1.0$  nM. However, myxothiazol only inhibited ~83 % of the NADH-oxidation activity, indicating that slow oxidation of NADH is possible under these conditions likely via exchange of DQH<sub>2</sub> and DQ between the SC particles and bulk pool (**Figure 3L**). The  $IC_{50}$  for the NADH-oxidation activity is consistent with that for the cyt *c*-reduction activity, at  $23.3 \pm 1.1$  nM and both activities show consistent Hill coefficients of  $1.9 \pm 0.3$  and  $1.7 \pm 0.1$ , respectively. (D) The CIII<sub>2</sub> Q<sub>N</sub>-site inhibitor antimycin A. Although strong inhibition is observed, neither the NADH-oxidation nor the cyt *c*-reduction activities show complete inhibition. Similar to myxothiazol, antimycin A inhibits ~80 % of the NADH-oxidation activity at 500 nM antimycin A, with  $IC_{50}$  of  $13.5 \pm 1.1$  nM and a Hill coefficient of  $2.5 \pm 0.3$ . Antimycin A blocks less of the cyt *c*-reduction activity compared to myxothiazol, with ~88 % inhibition at 1  $\mu$ M antimycin A, but the  $IC_{50}$  of  $16.7 \pm 1.1$  nM and Hill coefficient of  $1.8 \pm 0.2$  are consistent with the inhibition of NADH-oxidation. Inhibition of CIII<sub>2</sub> with antimycin A is known to result in increased ROS production at the Q<sub>P</sub> site. Due to the large amount of SOD present in our reaction buffer (50 U/mL), it is unlikely that the source of residual cyt *c* reduction would be via direct reduction of cyt *c* by superoxide. More likely an electron from CoQH<sub>2</sub> is able to transfer through CIII<sub>2</sub>, via UQCRFS1 and CYC1, to cyt *c*, reducing cyt *c* at the native CYC1 binding site. The CoQ<sup>•</sup> thus generated at the Q<sub>P</sub>-site would be converted back to CoQ through reaction with O<sub>2</sub>. However, more experiments are needed to confirm this hypothesis. One limitation of our isolated system, due to the lack of sealed membrane, is the absence of any membrane potential ( $\Delta\psi$ ) or proton gradient ( $\Delta pH$ ). Therefore, although we can measure the oxidase activity of CI we are unable to measure its coupled H<sup>+</sup>-pumping activity. This precludes direct demonstration that CI in the amphipol-stabilized SC I+III<sub>2</sub> maintains strong coupling between electron transfer and H<sup>+</sup>-pumping. However, coupling can be indirectly measured using known amiloride Na<sup>+</sup>/H<sup>+</sup>-antiporter inhibitors that also inhibit CI. (E) The amiloride inhibitor benzamil gave an  $IC_{50}$  for NADH-oxidation of  $35.6 \pm 1.1$   $\mu$ M and (F) the amiloride inhibitor MIA gave an  $IC_{50}$  of  $8.6 \pm 1.1$   $\mu$ M. While these data are indicative of coupling in CI, they must be interpreted with caution as the binding site of the amilorides has not been definitively determined. Data are represented as mean  $\pm$  SEM.



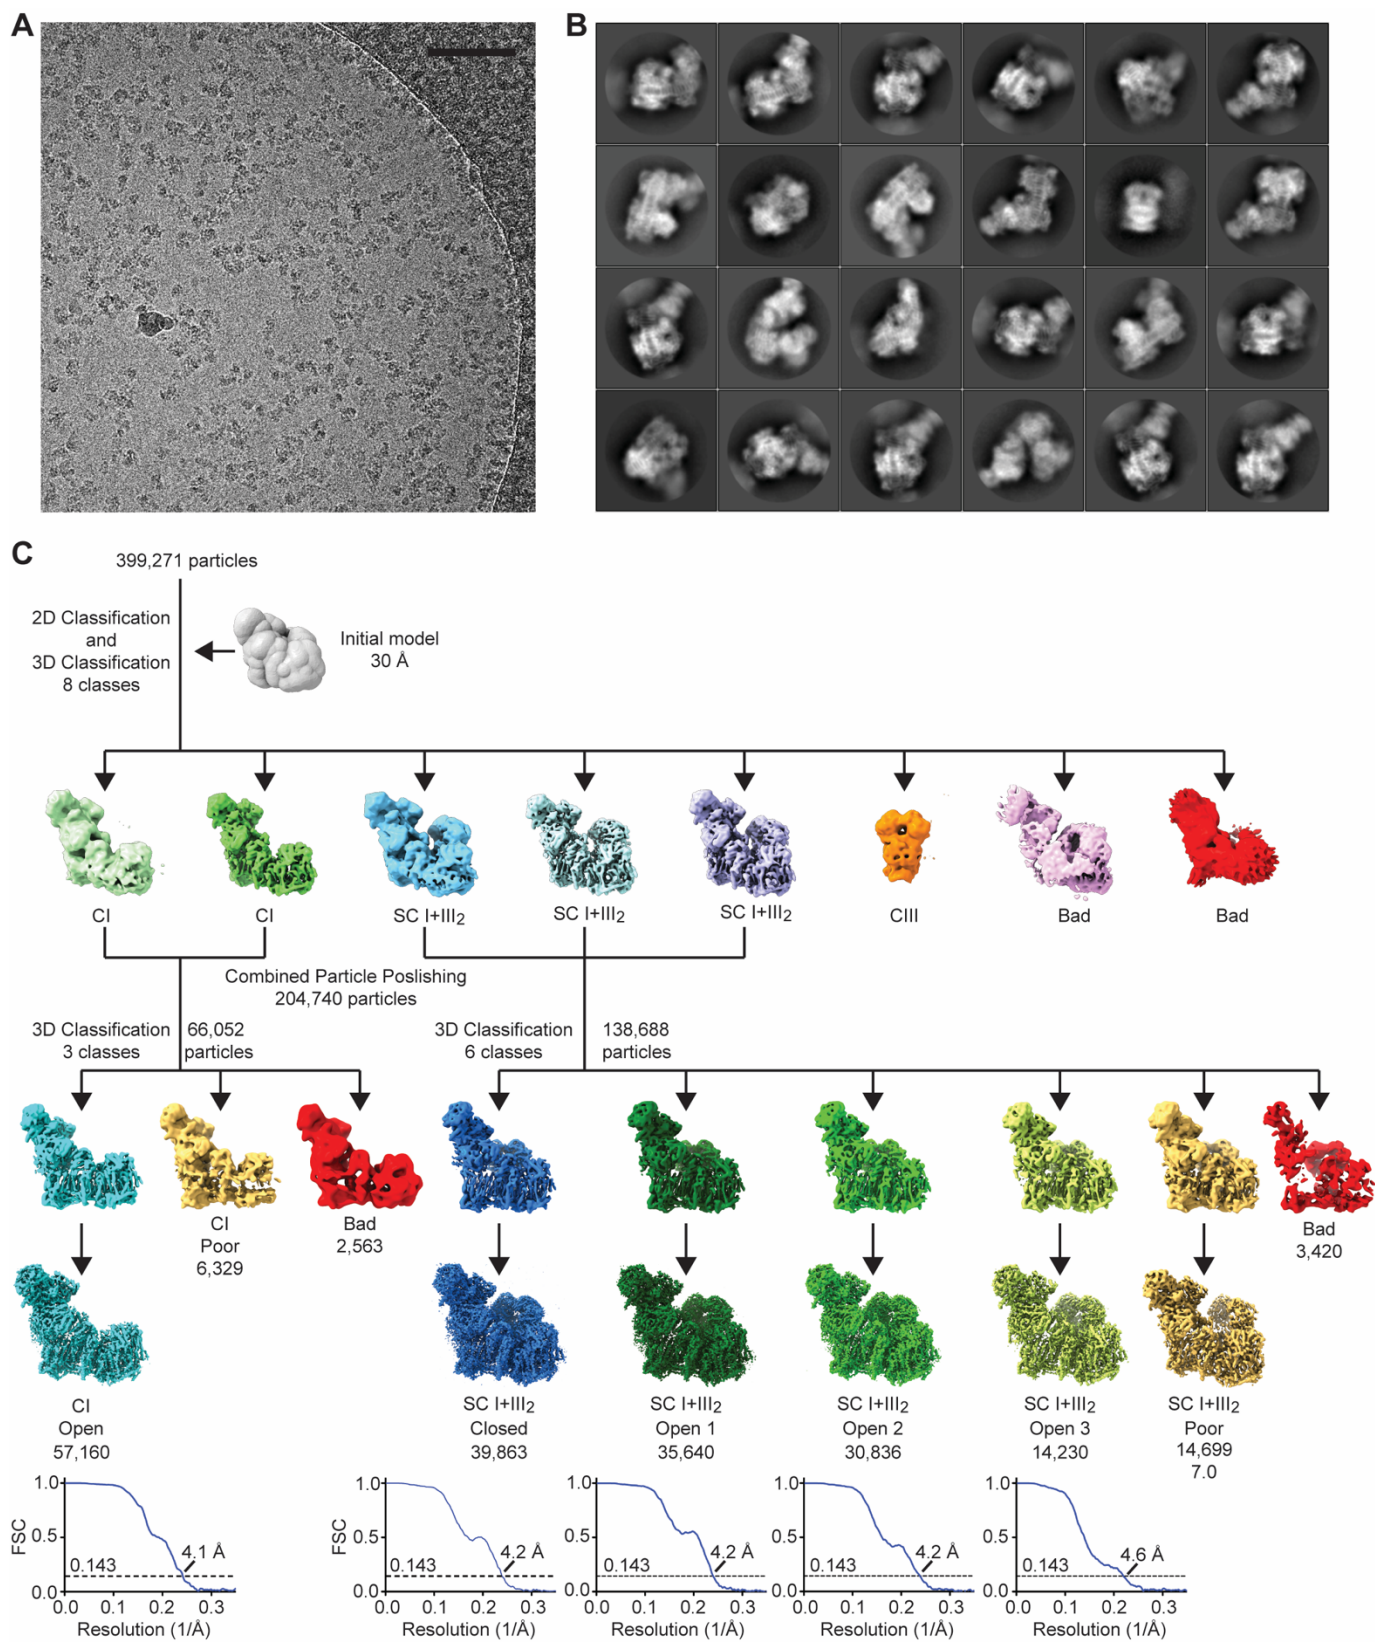



**Figure S4. Initial cryo-EM processing steps, Related to Figure 4**

(A) Representative micrograph of the 1,788 micrographs collected. Scale bar is 100 nm (B) Representative 2D class averages obtained from reference-free classification in Relion (Kimanius et al., 2016). (C) Initial classification and refinement procedures used in this study. The gold-standard FSC curves are shown below their respective final reconstructions.



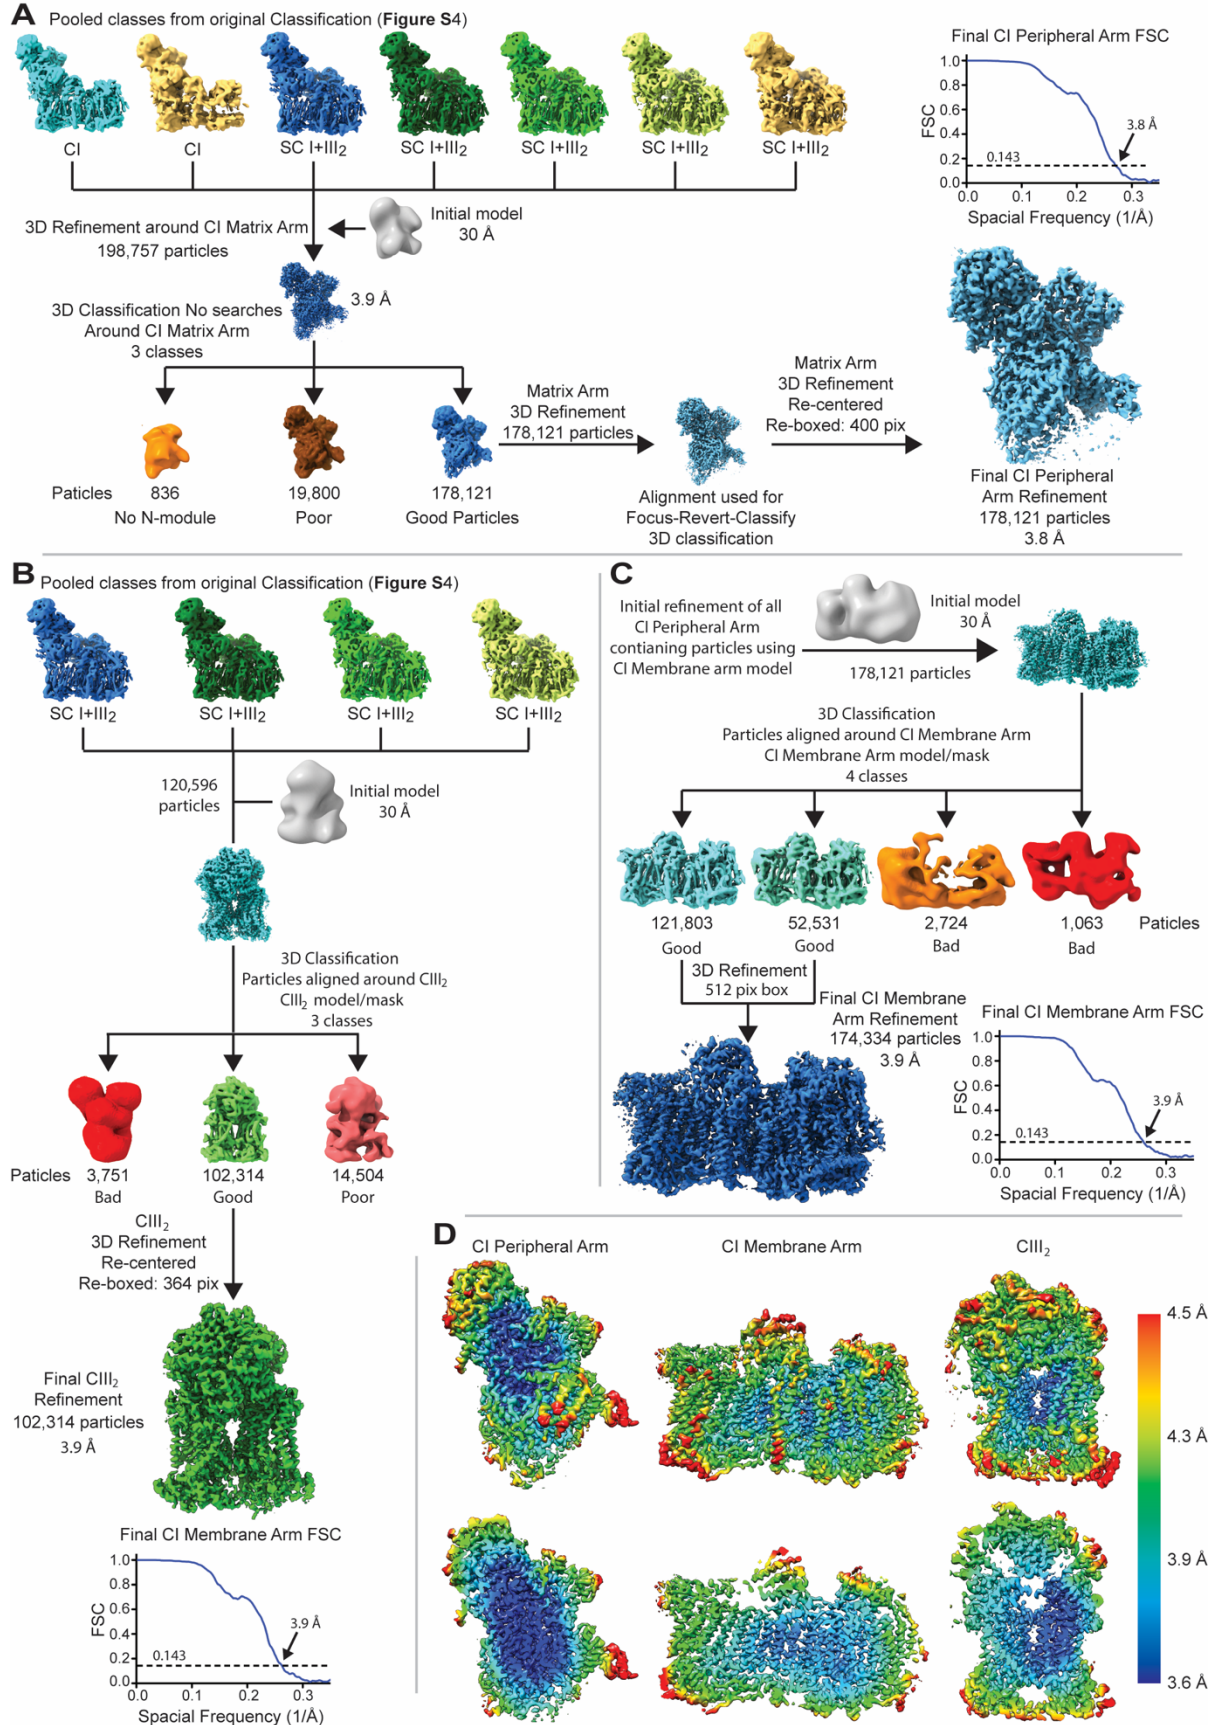



#### **Figure S5. Focused refinements, Related to STAR Methods**

(A) All CI-containing particles from the initial classifications (Figure S4) were pooled and aligned by the CI peripheral arm. An additional round of 3D-classification around the CI peripheral arm was performed to remove any remaining poorly aligning particles. The final set of 178,121 particles was then aligned, followed by re-centering and re-boxing of the particles focused on the CI peripheral arm using REP (D'Imprima et al., 2017). The final 3D-reconstruction had a nominal resolution of 3.8 Å according to the gold-standard FSC method. (B) All good CIII<sub>2</sub> containing particles (SC) from the initial 3D-classifications (Figure S4C) were combined and aligned around CIII<sub>2</sub>. An additional round of 3D classification was performed in order to remove any remaining poorly aligning particles. The final set of 102,314 particles was then aligned, followed by re-centering and re-boxing of the particles focused on CIII<sub>2</sub> peripheral arm using REP. All alignments were performed locally, so that overall orientation of CIII<sub>2</sub> vs SC was preserved. The final 3D-reconstruction had a nominal resolution of 3.9 Å according to the gold-standard FSC method. (C) The set of good CI peripheral arm containing particles were aligned by the CI membrane arm and then further classified to remove any remaining poorly aligning particles. The good CI membrane arm classes were combined into a final set containing 174,334 particles; re-centering failed to improve resolution or density features and hence was not performed for the final reconstruction. The final CI membrane arm reconstruction had a nominal resolution of 3.9 Å according to the gold-standard FSC method. (D) Local resolution maps of the CI peripheral arm (left), membrane arm (middle) and CIII<sub>2</sub> (right) showing side views (top) and slices into the protein cores (bottom).



**A**

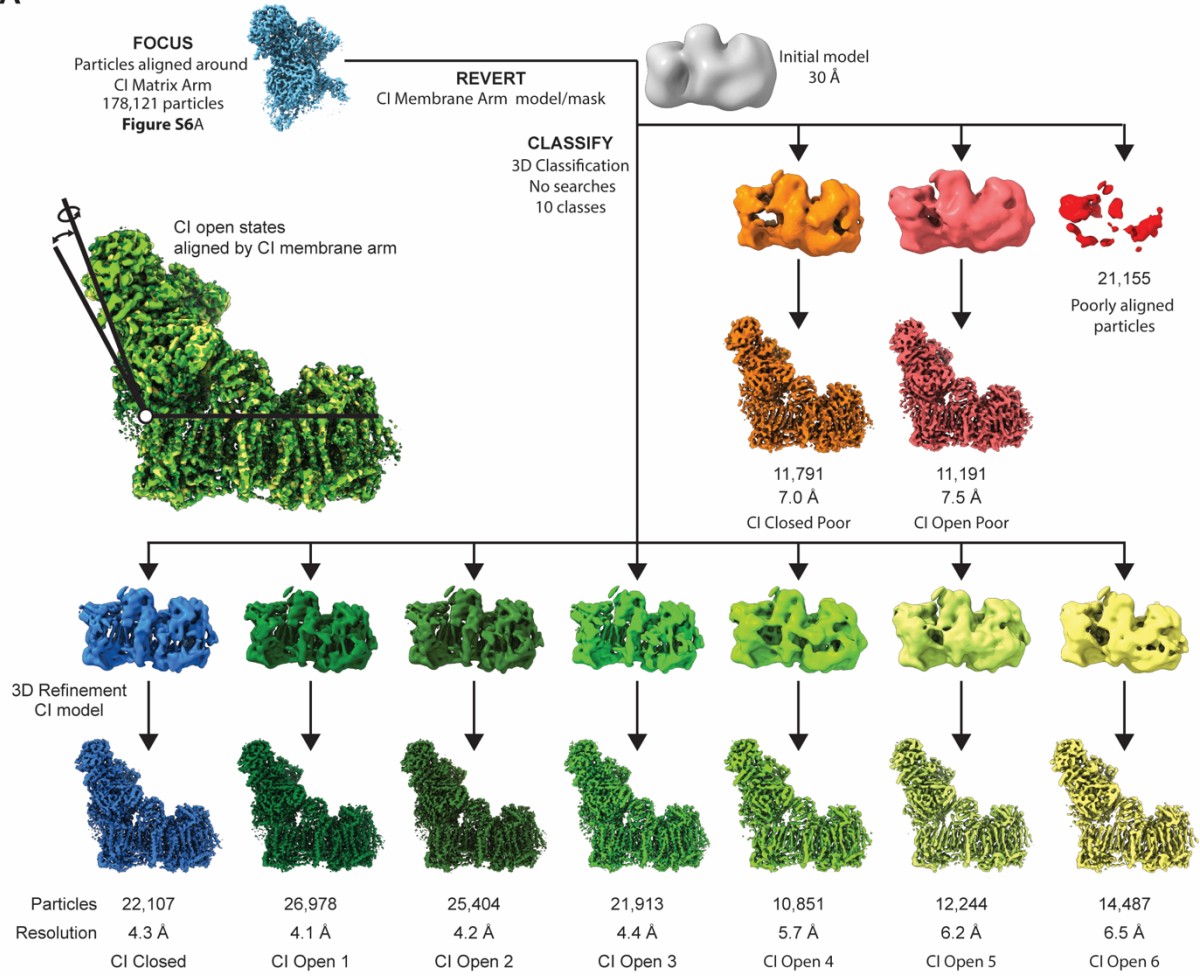

**B**

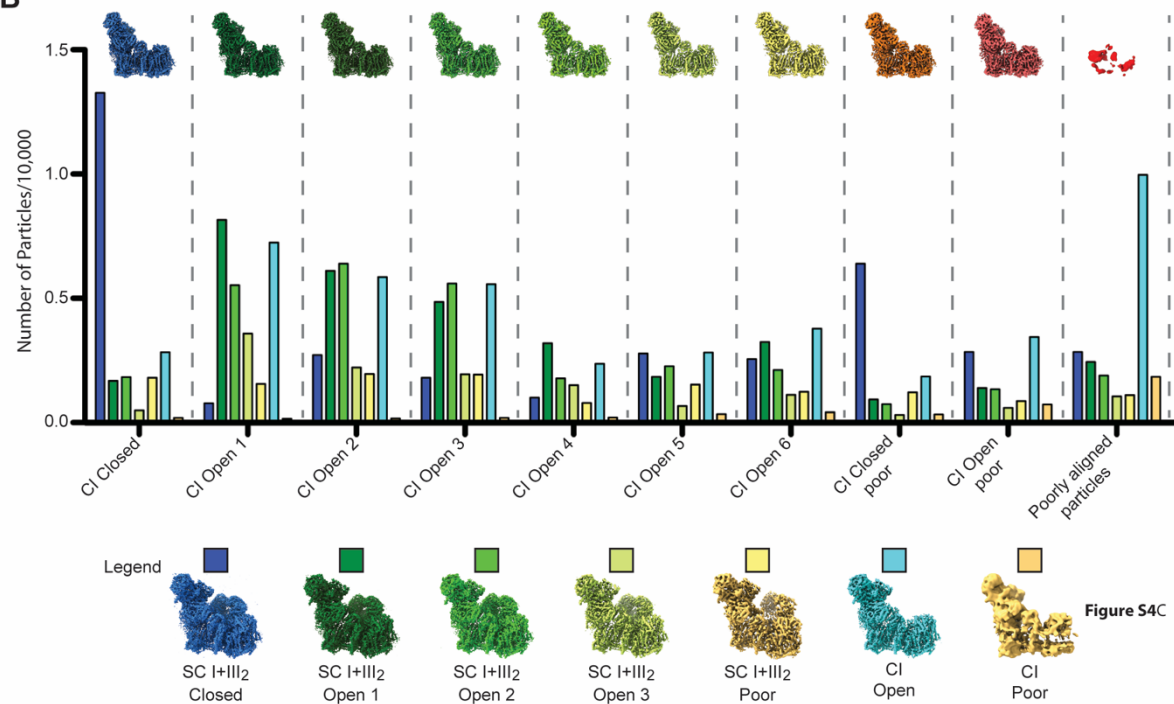



**Figure S6. Focus-Revert-Classify strategy to separate different classes of CI, Related to Figure 5**

(A) Particles aligned by the CI peripheral arm (**Figure S5A**) were classified into 10 classes using a mask for the CI membrane arm without rotational or translational searches. This resulted in the separation of seven classes of CI, which differed mainly in the angle between the membrane arm and peripheral arms (inset). The nominal resolution of these classes ranged from 4.1-6.5 Å according to the gold-standard FSC method. (B) Comparison of the original SC and isolated CI classes (**Figure 4C**) to focus-revert-classify classes with a histogram of particle counts shared between the original classes (see legend schematic) and each focus-revert-classify CI class (top, colored as in A).



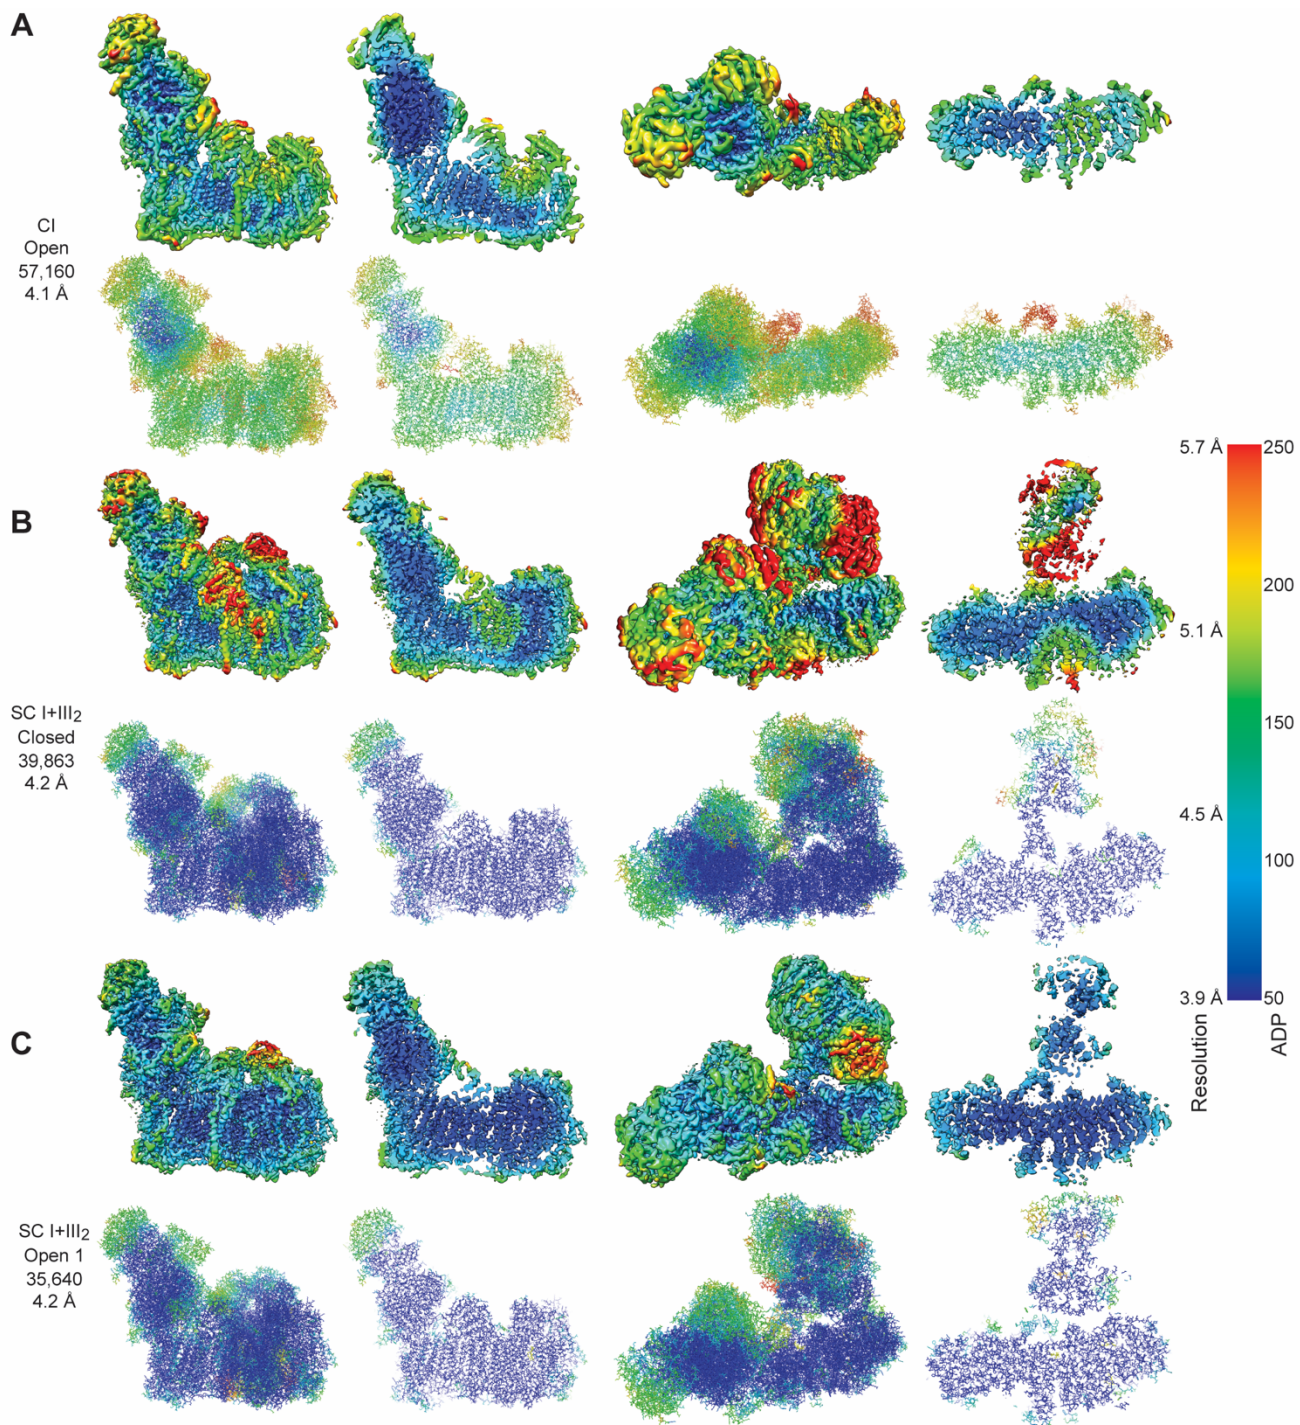

**D** SC Classification Model-Map FSCs

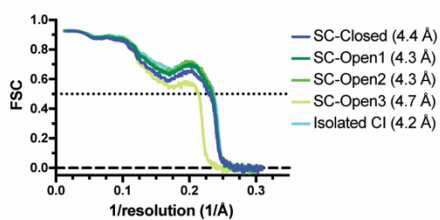

**E** Focused Refinement Model-Map FSCs

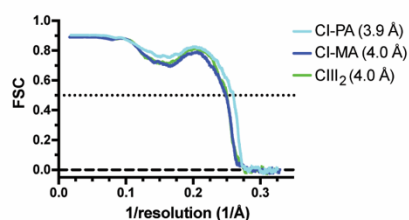

**F** Focus-Revert-Classify Model-Map FSCs

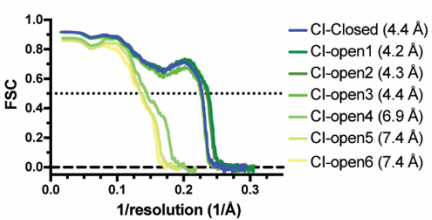



**Figure S7. Examples of match between local resolution and model ADPs for isolated CI and SC I+III<sub>2</sub>, Related to Figure 7 and STAR Methods**

(A) Local resolution maps (top) and refined models (bottom) for isolated CI. Side view and slice through CI (left) and matrix view and slice through membrane domain (right) are shown. (B) As in (A) for the SC I+III<sub>2</sub> closed state structure. (C) As in (A) for the SC I+III<sub>2</sub> open 1 state structure. The maps are colored by local resolution and the models are shown as sticks and colored by ADP. (D) FSC curves between the models and final maps for the initial SC classification (see **Figure S4**). (E) FSC curves between the models and final maps for the focused refinements (see **Figure S5**). (F) FSC curves between the models and final maps for the focus-revert-classify (FRC) classes (see **Figure S6**). The resolution at FSC = 0.5 is shown for each curve in the legend as well as in **Table 3**. Models for the low-resolution (>5Å) FRC classes (CI-open4, CI-open6, and CI-open7) are all poly-alanine and were only fit into the maps as rigid bodies without additional refinement.



# SUPPLEMENTARY TABLES

**Table S1. Mass Spectrometry identification for subunits of ovine SC I+III<sub>2</sub>, CI and CIII<sub>2</sub>, Related to Figure 1**

| Subunit                   |            | Mature subunit size |          | SC I+III <sub>2</sub> |            |                  |                                   | CI                |            |                  |                                   | CIII <sub>2</sub> |            |                  |                                   |
|---------------------------|------------|---------------------|----------|-----------------------|------------|------------------|-----------------------------------|-------------------|------------|------------------|-----------------------------------|-------------------|------------|------------------|-----------------------------------|
| Bovine name               | Human name | #aa                 | MW (kDa) | # unique peptides     | % coverage | % total spectrum | Slice with highest spectrum count | # unique peptides | % coverage | % total spectrum | Slice with highest spectrum count | # unique peptides | % coverage | % total spectrum | Slice with highest spectrum count |
| CI core subunits          |            |                     |          |                       |            |                  |                                   |                   |            |                  |                                   |                   |            |                  |                                   |
| ND1                       | ND1        | 318                 | 35.9     | 6                     | 15         | 0.04             | 18                                | 4                 | 11         | 0.04             | 18                                | 3 <sup>a</sup>    | 11         | 0.008            | 18                                |
| ND2                       | ND2        | 347                 | 39.1     | 2                     | 8          | 0.007            | 18                                | 4                 | 19         | 0.02             | 17                                | 3                 | 12         | 0.01             | 17                                |
| ND3                       | ND3        | 115                 | 13.1     | 1                     | 13         | 0.03             | 27                                | 1                 | 13         | 0.02             | 27                                | 1                 | 13         | 0.003            | 27                                |
| ND4                       | ND4        | 459                 | 52       | 6                     | 18         | 0.04             | 14                                | 6                 | 17         | 0.05             | 14                                | 2                 | 6          | 0.006            | 14                                |
| ND4L                      | ND4L       | 98                  | 10.8     | - <sup>b</sup>        | -          | -                | -                                 | -                 | -          | -                | -                                 | -                 | -          | -                | -                                 |
| ND5                       | ND5        | 606                 | 68.4     | 17                    | 31         | 0.19             | 11                                | 13                | 28         | 0.26             | 11                                | 12                | 19         | 0.08             | 12                                |
| ND6                       | ND6        | 175                 | 19.1     | 3                     | 18         | 0.02             | 25                                | 2                 | 5          | 0.02             | 25                                | 1                 | 5          | 0.009            | 25                                |
| 75 kDa                    | NDUFS1     | 704                 | 76.9     | 49                    | 77         | 1.5              | 4                                 | 41                | 59         | 1.6              | 4                                 | 27                | 42         | 0.51             | 4                                 |
| 49 kDa                    | NDUFS2     | 430                 | 49.1     | 23                    | 51         | 0.32             | 10                                | 20                | 45         | 0.52             | 10                                | 19                | 37         | 0.13             | 10                                |
| 30 kDa                    | NDUFS3     | 228                 | 26.4     | 21                    | 65         | 0.30             | 18                                | 16                | 55         | 0.33             | 18                                | 12                | 40         | 0.18             | 18                                |
| PSST                      | NDUFS7     | 179                 | 20.1     | 8                     | 36         | 0.26             | 22                                | 7                 | 36         | 0.27             | 22                                | 4                 | 18         | 0.07             | 21                                |
| TYKY                      | NDUFS8     | 176                 | 20.2     | 11                    | 51         | 0.12             | 21                                | 7                 | 42         | 0.11             | 21                                | 7                 | 42         | 0.05             | 21                                |
| 51 kDa                    | NDUFV1     | 444                 | 48.5     | 33                    | 82         | 0.59             | 9                                 | 24                | 60         | 0.67             | 9                                 | 45                | 30         | 0.17             | 8                                 |
| 24 kDa                    | NDUFV2     | 217                 | 23.8     | 15                    | 68         | 0.14             | 19                                | 13                | 58         | 0.17             | 20                                | 11                | 56         | 0.098            | 20                                |
| CI Supernumerary Subunits |            |                     |          |                       |            |                  |                                   |                   |            |                  |                                   |                   |            |                  |                                   |
| MWFE                      | NDUFA1     | 70                  | 8.2      | 3                     | 36         | 0.007            | 30                                | 2                 | 34         | 0.002            | 30                                | -                 | -          | -                | -                                 |
| B8                        | NDUFA2     | 98                  | 10.9     | 7                     | 43         | 0.11             | 29                                | 7                 | 43         | 0.14             | 29                                | 6                 | 43         | 0.08             | 29                                |
| B9                        | NDUFA3     | 83                  | 9.2      | 5                     | 87         | 0.07             | 30                                | 2                 | 22         | 0.06             | 30                                | 2                 | 22         | 0.03             | 29                                |
| B13                       | NDUFA5     | 115                 | 13.1     | 7                     | 72         | 0.09             | 28                                | 4                 | 31         | 0.06             | 29                                | 4                 | 31         | 0.06             | 28                                |
| B14                       | NDUFA6     | 127                 | 14.9     | 7                     | 39         | 0.06             | 27                                | 8                 | 51         | 0.10             | 27                                | 4                 | 33         | 0.05             | 27                                |
| B14.5a                    | NDUFA7     | 112                 | 12.4     | 10                    | 54         | 0.13             | 27                                | 10                | 54         | 0.15             | 27                                | 6                 | 53         | 0.07             | 27                                |
| PGIV                      | NDUFA8     | 171                 | 20       | 8                     | 52         | 0.14             | 24                                | 2                 | 43         | 0.061            | 24                                | 7                 | 14         | 0.16             | 23                                |
| 39 kDa                    | NDUFA9     | 344                 | 39       | 23                    | 59         | 0.48             | 14                                | 24                | 59         | 0.64             | 14                                | 21                | 56         | 0.22             | 14                                |
| 42 kDa                    | NDUFA10    | 320                 | 36.8     | 24                    | 68         | 0.39             | 12                                | 22                | 58         | 0.42             | 12                                | 15                | 42         | 0.18             | 12                                |
| B14.7                     | NDUFA11    | 140                 | 14.6     | 7                     | 64         | 0.11             | 27                                | 7                 | 64         | 0.11             | 27                                | 3                 | 30         | 0.02             | 27                                |
| B17.2                     | NDUFA12    | 145                 | 17.1     | 15                    | 88         | 0.30             | 25                                | 11                | 66         | 0.19             | 26                                | 7                 | 41         | 0.05             | 25                                |
| B16.6                     | NDUFA13    | 143                 | 16.6     | 15                    | 79         | 0.36             | 26                                | 13                | 79         | 0.18             | 26                                | 9                 | 50         | 0.10             | 25                                |
| SDAP                      | NDUFAB1    | 88                  | 10.1     | 4                     | 36         | 0.01             | 30                                | 2                 | 24         | 0.003            | 30                                | -                 | -          | -                | -                                 |
| MNLL                      | NDUFB1     | 57                  | 6.9      | 1                     | 30         | 0.002            | 31                                | 1                 | 30         | 0.001            | 31                                | -                 | -          | -                | -                                 |
| AGGG                      | NDUFB2     | 72                  | 8.5      | 2                     | 8          | 0.003            | 29                                | 2                 | 8          | 0.003            | 29                                | 1                 | 7          | 0.001            | Am <sup>c</sup>                   |
| B12                       | NDUFB3     | 97                  | 11       | 4                     | 45         | 0.06             | 28                                | 3                 | 28         | 0.02             | 29                                | 3                 | 28         | 0.02             | 28                                |
| B15                       | NDUFB4     | 128                 | 15       | 11                    | 70         | 0.11             | 26                                | 11                | 70         | 0.08             | 27                                | 7                 | 51         | 0.05             | 26                                |
| SGDH                      | NDUFB5     | 143                 | 16.7     | 10                    | 37         | 0.17             | 25                                | 9                 | 37         | 0.21             | 25                                | 6                 | 26         | 0.07             | 25                                |
| B17                       | NDUFB6     | 127                 | 15.4     | 7                     | 51         | 0.07             | 24                                | 7                 | 45         | 0.07             | 24                                | 3                 | 29         | 0.01             | 24                                |
| B18                       | NDUFB7     | 136                 | 16.3     | 11                    | 72         | 0.17             | 24                                | 10                | 60         | 0.23             | 24                                | 9                 | 59         | 0.05             | 23                                |
| ASHI                      | NDUFB8     | 158                 | 18.8     | 9                     | 60         | 0.07             | 24                                | 7                 | 53         | 0.1              | 23                                | 5                 | 44         | 0.01             | 23                                |
| B22                       | NDUFB9     | 178                 | 21.6     | 8                     | 56         | 0.13             | 20                                | 5                 | 28         | 0.06             | 21                                | 4                 | 20         | 0.05             | 20                                |
| PDSW                      | NDUFB10    | 175                 | 20.8     | 11                    | 59         | 0.19             | 21                                | 11                | 54         | 0.19             | 20<br>(21)                        | 9                 | 53         | 0.13             | 21                                |
| ESSS                      | NDUFB11    | 125                 | 14.4     | 8                     | 52         | 0.20             | 24                                | 6                 | 45         | 0.15             | 24                                | 3                 | 23         | 0.03             | 24                                |
| KFYI                      | NDUFC1     | 49                  | 5.8      | 1                     | 20         | 0.006            | 30                                | 1                 | 20         | 0.001            | 29                                | 1                 | 20         | 0.004            | 31                                |



|                   |            |     |      |    |    |       |    |    |    |       |                 |    |    |       |    |
|-------------------|------------|-----|------|----|----|-------|----|----|----|-------|-----------------|----|----|-------|----|
| B14.5b            | NDUFC2     | 120 | 14.2 | 9  | 60 | 0.09  | 26 | 8  | 59 | 0.12  | 27              | 5  | 32 | 0.05  | 26 |
| 18 kDa (AQDQ)     | NDUFS4     | 133 | 15.3 | 11 | 62 | 0.20  | 25 | 7  | 46 | 0.21  | 25              | 5  | 41 | 0.03  | 25 |
| 15 kDa (PFFD)     | NDUFS5     | 105 | 12.4 | 6  | 47 | 0.05  | 27 | 6  | 44 | 0.06  | 27              | 3  | 14 | 0.007 | 26 |
| 13 kDa            | NDUFS6     | 96  | 10.6 | 8  | 79 | 0.09  | 28 | 4  | 44 | 0.02  | 27              | 6  | 54 | 0.01  | 28 |
| 10 kDa            | NDUFV3     | 75  | 8.4  | 1  | 23 | 0.002 | 29 | 1  | 23 | 0.007 | 29              | 1  | 23 | 0.002 | 28 |
| CIII <sub>2</sub> |            |     |      |    |    |       |    |    |    |       |                 |    |    |       |    |
| Core 1            | UQCRC1     | 446 | 49.3 | 27 | 59 | 1.0   | 9  | 18 | 46 | 0.34  | 9               | 28 | 57 | 1.6   | 9  |
| Core 2            | UQCRC2     | 439 | 46.6 | 31 | 61 | 0.69  | 11 | 23 | 59 | 0.39  | 11              | 34 | 91 | 1.2   | 11 |
| Cyt <i>b</i>      | MT-CYB     | 379 | 42.8 | 2  | 9  | 0.02  | 16 | 1  | 2  | 0.004 | 16              | 2  | 5  | 0.07  | 16 |
| Cyt <i>c</i> 1    | CYC1       | 241 | 27.3 | 12 | 39 | 0.18  | 18 | 7  | 32 | 0.12  | 16              | 12 | 43 | 0.84  | 17 |
| Rieske            | UQCRFS1    | 196 | 21.6 | 14 | 30 | 0.25  | 19 | 10 | 29 | 0.09  | 19              | 15 | 35 | 0.42  | 20 |
| 14 kDa            | UQCRB      | 110 | 13.4 | 11 | 57 | 0.22  | 27 | 9  | 57 | 0.13  | 27              | 11 | 57 | 0.53  | 27 |
| QP-C              | UQCRQ      | 81  | 9.6  | 7  | 84 | 0.05  | 28 | 1  | 16 | 0.03  | Am <sup>c</sup> | 9  | 78 | 0.25  | 28 |
| 11 kDa            | UQCRH      | 78  | 9.2  | 4  | 38 | 0.008 | 28 | -  | -  | -     | -               | 4  | 48 | 0.02  | 28 |
| 8 kDa             | Subunit 11 | 78  | 7.9  |    |    |       | 31 |    |    |       | 31              |    |    |       | 31 |
| 7.2 kDa           | UQCR10     | 63  | 7.3  | 3  | 50 | 0.04  | 31 | 2  | 38 | 0.04  | 31              | 4  | 52 | 0.06  | 31 |
| 6.4 kDa           | UQCR11     | 56  | 6.5  | 1  | 21 | 0.001 | 31 | -  | -  | -     | -               | 1  | 21 | 0.002 | 31 |

<sup>a</sup>Subunits that are not expected in the sample are shown with data in grey, but in most cases are still detectable at lower levels.

<sup>b</sup>A dash indicates that no peptides were detected for the subunit.

<sup>c</sup>Ambiguous

**Table S2. Lipid content of isolated SC I+III<sub>2</sub> particles compared to mitochondrial membranes, Related to STAR methods**

| SC I+III <sub>2</sub><br>Preparation | [Protein]<br>mg/mL<br>(n = 3-6) | [SC I+III <sub>2</sub> ] $\mu$ M | [PO <sub>4</sub> ] <sub>org</sub> $\mu$ M<br>(n = 3-6) | [Lipid] $\mu$ M <sup>a</sup> | nmole Lipid /<br>mg Protein  | Lipid<br>molecules /<br>SC I+III <sub>2</sub> |
|--------------------------------------|---------------------------------|----------------------------------|--------------------------------------------------------|------------------------------|------------------------------|-----------------------------------------------|
| 1                                    | 9.1 $\pm$ 0.3 <sup>b</sup>      | 6.3 $\pm$ 0.2                    | 874 $\pm$ 85                                           | 728 $\pm$ 71                 | 80 $\pm$ 8                   | 116 $\pm$ 12                                  |
| 2                                    | 8.1 $\pm$ 0.4                   | 5.6 $\pm$ 0.3                    | 897 $\pm$ 55                                           | 748 $\pm$ 45                 | 92 $\pm$ 7                   | 133 $\pm$ 11                                  |
| 3                                    | 12.5 $\pm$ 0.3                  | 8.6 $\pm$ 0.2                    | 1298 $\pm$ 49                                          | 1082 $\pm$ 41                | 87 $\pm$ 4                   | 126 $\pm$ 6                                   |
| 4                                    | 16.0 $\pm$ 0.2                  | 11.0 $\pm$ 0.1                   | 1537 $\pm$ 25                                          | 1281 $\pm$ 21                | 80 $\pm$ 2                   | 116 $\pm$ 2                                   |
| 5                                    | 10.5 $\pm$ 0.6                  | 7.2 $\pm$ 0.4                    | 1023 $\pm$ 80                                          | 853 $\pm$ 67                 | 81 $\pm$ 8                   | 118 $\pm$ 12                                  |
| <b>Average:</b>                      |                                 |                                  |                                                        |                              | <b>84 <math>\pm</math> 6</b> | <b>122 <math>\pm</math> 8</b>                 |

|                                         |                |     |                |                |              |     |
|-----------------------------------------|----------------|-----|----------------|----------------|--------------|-----|
| Suspended<br>Mitochondrial<br>Membranes | 14.1 $\pm$ 0.6 | --- | 2597 $\pm$ 198 | 2164 $\pm$ 165 | 153 $\pm$ 13 | --- |
|-----------------------------------------|----------------|-----|----------------|----------------|--------------|-----|

<sup>a</sup>Assuming ratio of 4:1 phospholipid:cardiolipin

<sup>b</sup>Mean  $\pm$  SEM, throughout



**Table S3.  $K_{cat}$  for CI and CIII<sub>2</sub> within the SC and Rate Coupling, Related to Figures 2 and 3**

| Condition                                 | $K_{cat}$ (s <sup>-1</sup> ) |                                        |                                                     | Rate coupling <sup>a</sup><br>(cyt c reduced /<br>NADH oxidized) |
|-------------------------------------------|------------------------------|----------------------------------------|-----------------------------------------------------|------------------------------------------------------------------|
|                                           | NADH oxidized per<br>CI      | Cyt c reduced per<br>CIII <sub>2</sub> | CoQH <sub>2</sub> oxidized per<br>CIII <sub>2</sub> |                                                                  |
| No DQ                                     | 9.9 ± 0.2                    | 17.9 ± 0.2                             | 8.9 ± 0.1                                           | 1.80 ± 0.05                                                      |
| 10 µM DQ                                  | 53.4 ± 1.5                   | 102 ± 2                                | 50.8 ± 0.7                                          | 1.90 ± 0.06                                                      |
| 100 µM DQ                                 | 45.2 ± 1.2                   | 80.3 ± 1.7                             | 40.1 ± 0.8                                          | 1.78 ± 0.06                                                      |
| 100 µM DQ, 10 µM BSA                      | 59.0 ± 1.5                   | 70.6 ± 3.4                             | 35.3 ± 1.7                                          | 1.20 ± 0.06                                                      |
| 100 µM DQ, Lipid-Detergent<br>(LD) buffer | 188 ± 3                      | 226 ± 2                                | 113 ± 1                                             | 1.21 ± 0.02                                                      |
| Ratio of activity<br>LD-buffer/10 µM DQ   | 3.52 ± 0.11                  | 2.23 ± 0.04                            | 1.11 ± 0.02 <sup>b</sup>                            |                                                                  |

<sup>a</sup>The expected ratio for perfect rate coupling is 2.0 cyt c reduced / NADH oxidized

<sup>b</sup>This ratio was calculated between LD-buffer per Q<sub>P</sub> site and 10 µM DQ per CIII<sub>2</sub> indicating that the increase in CIII<sub>2</sub> activity in LD-buffer may result from increased access to the CIII<sub>2</sub> active sites already present

**Table S4. Cryo-EM data collection, Related to Figure 4**

|                                                     |                                       |
|-----------------------------------------------------|---------------------------------------|
| Data Collection and processing                      |                                       |
| Microscope                                          | FEI Titan Krios (at eBIC, Diamond UK) |
| Camera                                              | FEI Falcon II                         |
| Magnification                                       | 100,000x                              |
| Voltage (kV)                                        | 300                                   |
| Electron exposure (e <sup>-</sup> /Å <sup>2</sup> ) | 51                                    |
| Defocus range (µm)                                  | ~-1.5 to -3.0                         |
| Pixel size (Å)                                      | 1.4                                   |
| Software                                            | RELION 2.1                            |



**Table S5. SC I+III<sub>2</sub> closed model overview, Related to STAR Methods**

| Subunit Name<br>Human / Bovine   | Chain<br>ID | #aa built /<br>#aa total | Un-modelled<br>residues       | % atomic<br>model | TMHs | Co-factors / Notes                                                                                         |
|----------------------------------|-------------|--------------------------|-------------------------------|-------------------|------|------------------------------------------------------------------------------------------------------------|
| <b>CI core subunits</b>          |             |                          |                               |                   |      |                                                                                                            |
| ND1                              | D1          | 318 / 318                | -                             | 100               | 8    | -                                                                                                          |
| ND2                              | D2          | 347 / 347                | -                             | 100               | 11   | antiporter-like                                                                                            |
| ND3                              | D3          | 115 / 115                | -                             | 100               | 3    | TMH1-TMH2 loop becomes<br>ordered in open/closed<br>transition                                             |
| ND4                              | D4          | 459 / 459                | -                             | 100               | 14   | antiporter-like                                                                                            |
| ND4L                             | 4L          | 98 / 98                  | -                             | 100               | 3    | -                                                                                                          |
| ND5                              | D5          | 606 / 606                | -                             | 100               | 16   | antiporter-like                                                                                            |
| ND6                              | D6          | 175 / 175                | -                             | 100               | 5    | TMH3 undergoes $\pi$ -to- $\alpha$<br>helix conversion in open-<br>closed transition                       |
| NDUFS1 / 75 kDa                  | S1          | 688 / 704                | 1-5, 694-704                  | 97.7              | -    | N1b (2Fe[75])<br>N4 (4Fe[74]C)<br>N5 (4Fe[75]H)                                                            |
| NDUFS2 / 49 kDa                  | S2          | 430 / 430                | -                             | 100               | -    | N1a (2Fe[24])<br>$\beta$ 1- $\beta$ 2 loop undergoes<br>conformational change in<br>open-closed transition |
| NDUFS3 / 30 kDa                  | S3          | 208 / 228                | 1-6, 215-228                  | 91.2              | -    | -                                                                                                          |
| NDUFS7 / PSST                    | S7          | 156 / 179                | 1-23                          | 87.1              | -    | -                                                                                                          |
| NDUFS8 / TYKY                    | S8          | 176 / 176                | -                             | 100               | -    | N6a (4Fe[TY]1)                                                                                             |
| NDUFV1 / 51 kDa                  | V1          | 429 / 444                | 1-9, 439-444                  | 96.6              | -    | N6b (4Fe[TY]2)                                                                                             |
| NDUFV2 / 24 kDa                  | V2          | 212 / 217                | 1-4, 217                      | 97.7              | -    | FMN<br>N3 (4Fe[51])                                                                                        |
| <b>CI Supernumerary Subunits</b> |             |                          |                               |                   |      |                                                                                                            |
| NDUFA1 / MWFE                    | A1          | 70 / 70                  | -                             | 100               | 1    | -                                                                                                          |
| NDUFA2 / B8                      | A2          | 82 / 98                  | 1-12, 95-98                   | 83.7              | -    | Thioredoxin fold                                                                                           |
| NDUFA3 / B9                      | A3          | 74 / 83                  | 1-9                           | 89.2              | 1    | -                                                                                                          |
| NDUFA5 / B13                     | A5          | 111 / 115                | 1-4                           | 96.5              | -    | -                                                                                                          |
| NDUFA6 / B14                     | A6          | 114 / 127                | 1-13                          | 89.8              | -    | LYR protein                                                                                                |
| NDUFA7 / B14.5a                  | A7          | 96 / 112                 | 73-88                         | 85.7              | -    | -                                                                                                          |
| NDUFA8 / PGIV                    | A8          | 171 / 171                | -                             | 100               | -    | -                                                                                                          |
| NDUFA9 / 39 kDa                  | A9          | 298 / 344                | 187-194, 253-<br>277, 332-344 | 86.6              | -    | NADPH                                                                                                      |
| NDUFA10 / 42 kDa                 | AJ          | 319 / 320                | 320                           | 99.7              | -    | Nucleoside kinase family                                                                                   |
| NDUFA11 / B14.7                  | AK          | 140 / 140                | -                             | 100               | 4    | -                                                                                                          |
| NDUFA12 / B17.2                  | AL          | 123 / 145                | 1-22                          | 84.8              | -    | -                                                                                                          |
| NDUFA13 / B16.6                  | AM          | 139 / 143                | 1-4                           | 97.2              | 1    | Identical to GRIM-19                                                                                       |
| NDUFAB1 / SDAP                   | AA          | 80 / 88                  | 1-4, 85-88                    | 90.9              | -    | acyl carrier protein,<br>phosphopantetheine acyl-<br>chain                                                 |
| NDUFAB1 / SDAP                   | AB          | 87 / 88                  | 1                             | 98.9              | -    | acyl carrier protein,<br>phosphopantetheine acyl-<br>chain                                                 |
| NDUFB1 / MNLL                    | B1          | 52 / 57                  | 1-5                           | 91.2              | 1    | -                                                                                                          |
| NDUFB2 / AGGG                    | B2          | 64 / 72                  | 1-4, 69-72                    | 88.9              | 1    | -                                                                                                          |



|                           |    |             |                |      |   |                                               |
|---------------------------|----|-------------|----------------|------|---|-----------------------------------------------|
| NDUFB3 / B12              | B3 | 73 / 97     | 1-10, 84-97    | 75.3 | 1 | -                                             |
| NDUFB4 / B15              | B4 | 128 / 128   | -              | 100  | 1 | -                                             |
| NDUFB5 / SGDH             | B5 | 139 / 143   | 1-4            | 97.2 | 1 | -                                             |
| NDUFB6 / B17              | B6 | 95 / 127    | 37-66, 126-127 | 74.8 | 1 | -                                             |
| NDUFB7 / B18              | B7 | 119 / 136   | 120-136        | 87.5 | - | Double Cx <sub>9</sub> C<br>CHC domain        |
| NDUFB8 / ASH1             | B8 | 157 / 158   | 1              | 99.4 | 1 | -                                             |
| NDUFB9 / B22              | B9 | 176 / 178   | 1, 178         | 98.9 | - | LYR protein                                   |
| NDUFB10 / PDSW            | BJ | 171 / 175   | 1-2, 174-175   | 97.7 | - | -                                             |
| NDUFB11 / ESSS            | BK | 102 / 125   | 1-21, 124-125  | 81.6 | 1 | -                                             |
| NDUFC1 / KFYI             | C1 | 46 / 49     | 47-49          | 93.9 | 1 | -                                             |
| NDUFC2 / B14.5b           | C2 | 119 / 120   | 1              | 99.2 | 2 | -                                             |
| NDUFS4 / 18 kDa<br>(AQDQ) | S4 | 126 / 133   | 1-7            | 94.7 | - | -                                             |
| NDUFS5 / 15 kDa<br>(PFFD) | S5 | 99 / 105    | 100-105        | 94.4 | - | Quadruple CX <sub>9</sub> C<br>2 CHCH domains |
| NDUFS6 / 13 kDa           | S6 | 89 / 96     | 1-7            | 92.7 | - | Zn <sup>2+</sup>                              |
| NDUFV3 / 10 kDa           | V3 | 41 / 75     | 1-34           | 54.7 | - | -                                             |
| CI Total                  |    | 8117 / 8514 |                | 95.3 |   |                                               |
| CIII Protomer 1           |    |             |                |      |   |                                               |
| UQCRC1 / Core 1           | a1 | 439 / 446   | 1, 223-228     | 98.4 | - | Peptidase M16 fold                            |
| UQCRC2 / Core 2           | a2 | 414 / 439   | 1-19, 228-333  | 94.3 | - | Peptidase M16 fold                            |
| MT-CYB / Cyt <i>b</i>     | b1 | 378 / 379   | 1              | 99.7 | 8 | Two <i>b</i> -type hemes                      |
| CYC1 / Cyt <i>c1</i>      | c1 | 240 / 241   | 241            | 99.6 | 1 | covalently bound <i>c</i> -type<br>heme       |
| UQCRFS1 / Rieske          | f1 | 196 / 196   | -              | 100  | 1 | 2Fe2S cluster                                 |
| UQCRB / 14 kDa            | d1 | 100 / 110   | 1-10           | 90.9 | - | -                                             |
| UQCRQ / QP-C              | q1 | 73 / 81     | 74-81          | 90.1 | 1 | -                                             |
| UQCRQH / 11 kDa           | h1 | 65 / 78     | 1-12, 78       | 83.3 | - | -                                             |
| UQCRFS1N / 8 kDa          | x1 | 78          |                | 0.0  | - | poly-Ala                                      |
| UQCR10 / 7.2 kDa          | i1 | 55 / 63     | 1-4, 60-63     | 87.3 | 1 | -                                             |
| CIII Protomer 2           |    |             |                |      |   |                                               |
| UQCRC1 / Core 1           | a3 | 444 / 446   | 1, 446         | 99.6 | - | Peptidase M16 fold                            |
| UQCRC2 / Core 2           | a4 | 413 / 439   | 1-19, 228-334  | 94.1 | - | Peptidase M16 fold                            |
| MT-CYB / Cyt <i>b</i>     | b2 | 378 / 379   | 1              | 99.7 | 8 | Two <i>b</i> -type hemes                      |
| CYC1 / Cyt <i>c1</i>      | c2 | 239 / 241   | 1, 240         | 99.2 | 1 | covalently bound <i>c</i> -type<br>heme       |
| UQCRFS1 / Rieske          | f2 | 195 / 196   | 1              | 99.5 | 1 | 2Fe2S cluster                                 |
| UQCRB / 14 kDa            | d2 | 101 / 110   | 1-8, 110       | 91.8 | - | -                                             |
| UQCRQ / QP-C              | q2 | 75 / 81     | 1, 77-81       | 92.6 | 1 | -                                             |
| UQCRQH / 11 kDa           | h2 | 65 / 78     | 1-12, 78       | 83.3 | - | -                                             |
| UQCRFS1N / 8 kDa          | x2 | 78          |                | 0.0  | - | poly-Ala                                      |
| UQCR10 / 7.2 kDa          | i2 | 57 / 63     | 1-2, 59-63     | 90.5 | 1 | -                                             |
| CIII <sub>2</sub> Total   |    | 3927 / 4222 |                | 93.0 |   |                                               |
